# Supplementary figures and images for: A distinct tethering step is vital for vacuole membrane fusion
Source: eLife journal article supplement (doi:10.7554/elife.03251), 2014-09-25

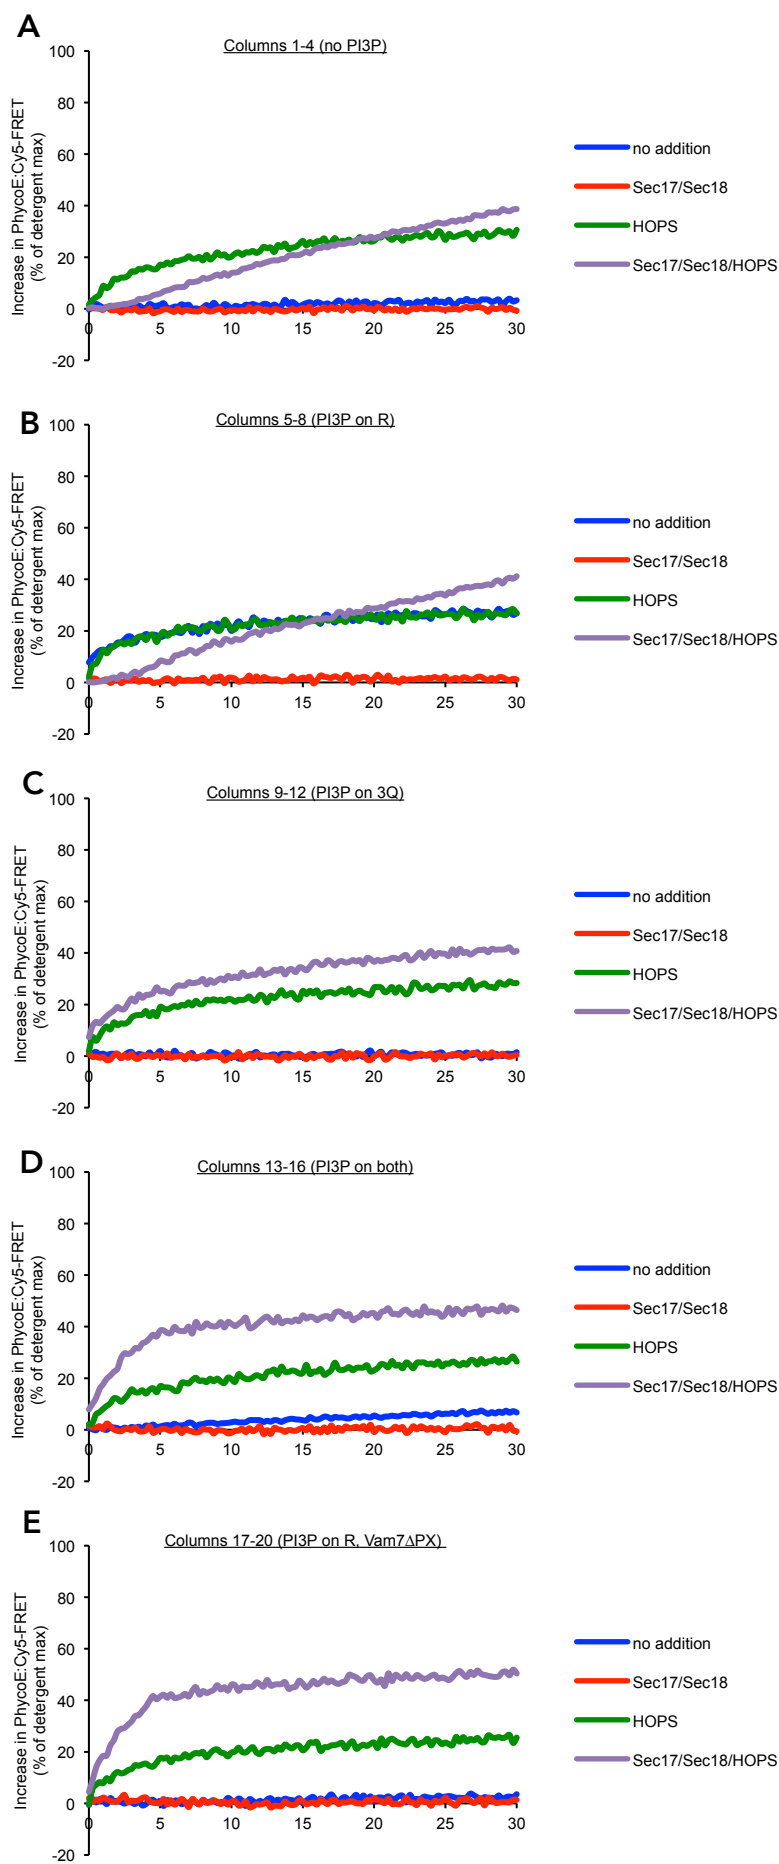

Supplement: supp [file elife-03251-supp-v1.zip]

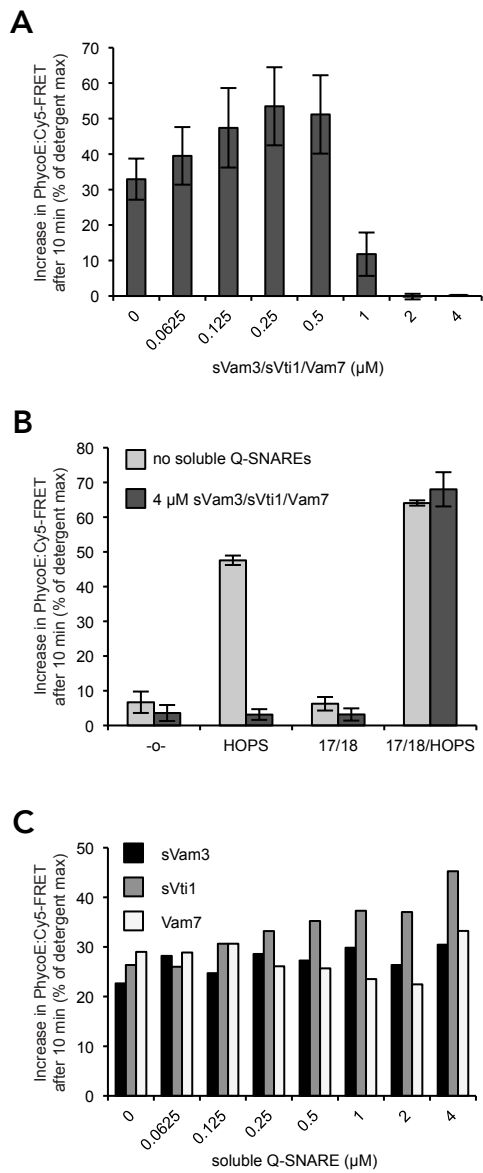

Supplement: supp [file elife-03251-supp-v1.zip]

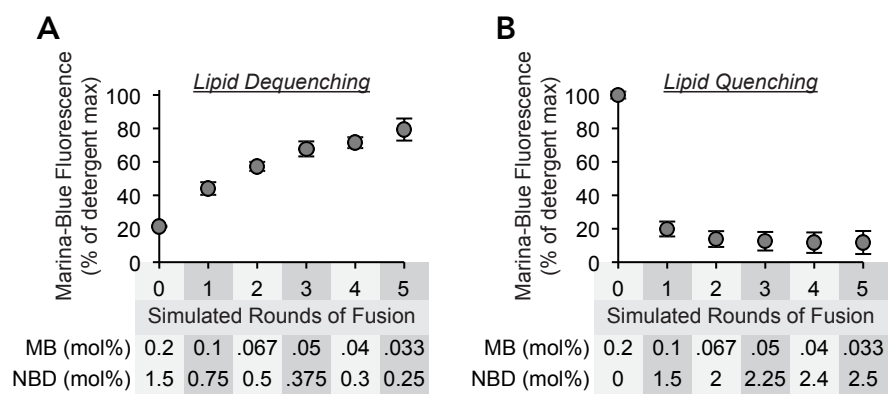

Supplement: supp [file elife-03251-supp-v1.zip]

Zick & Wickner 2014 Figure 1 - Figure supplement 1

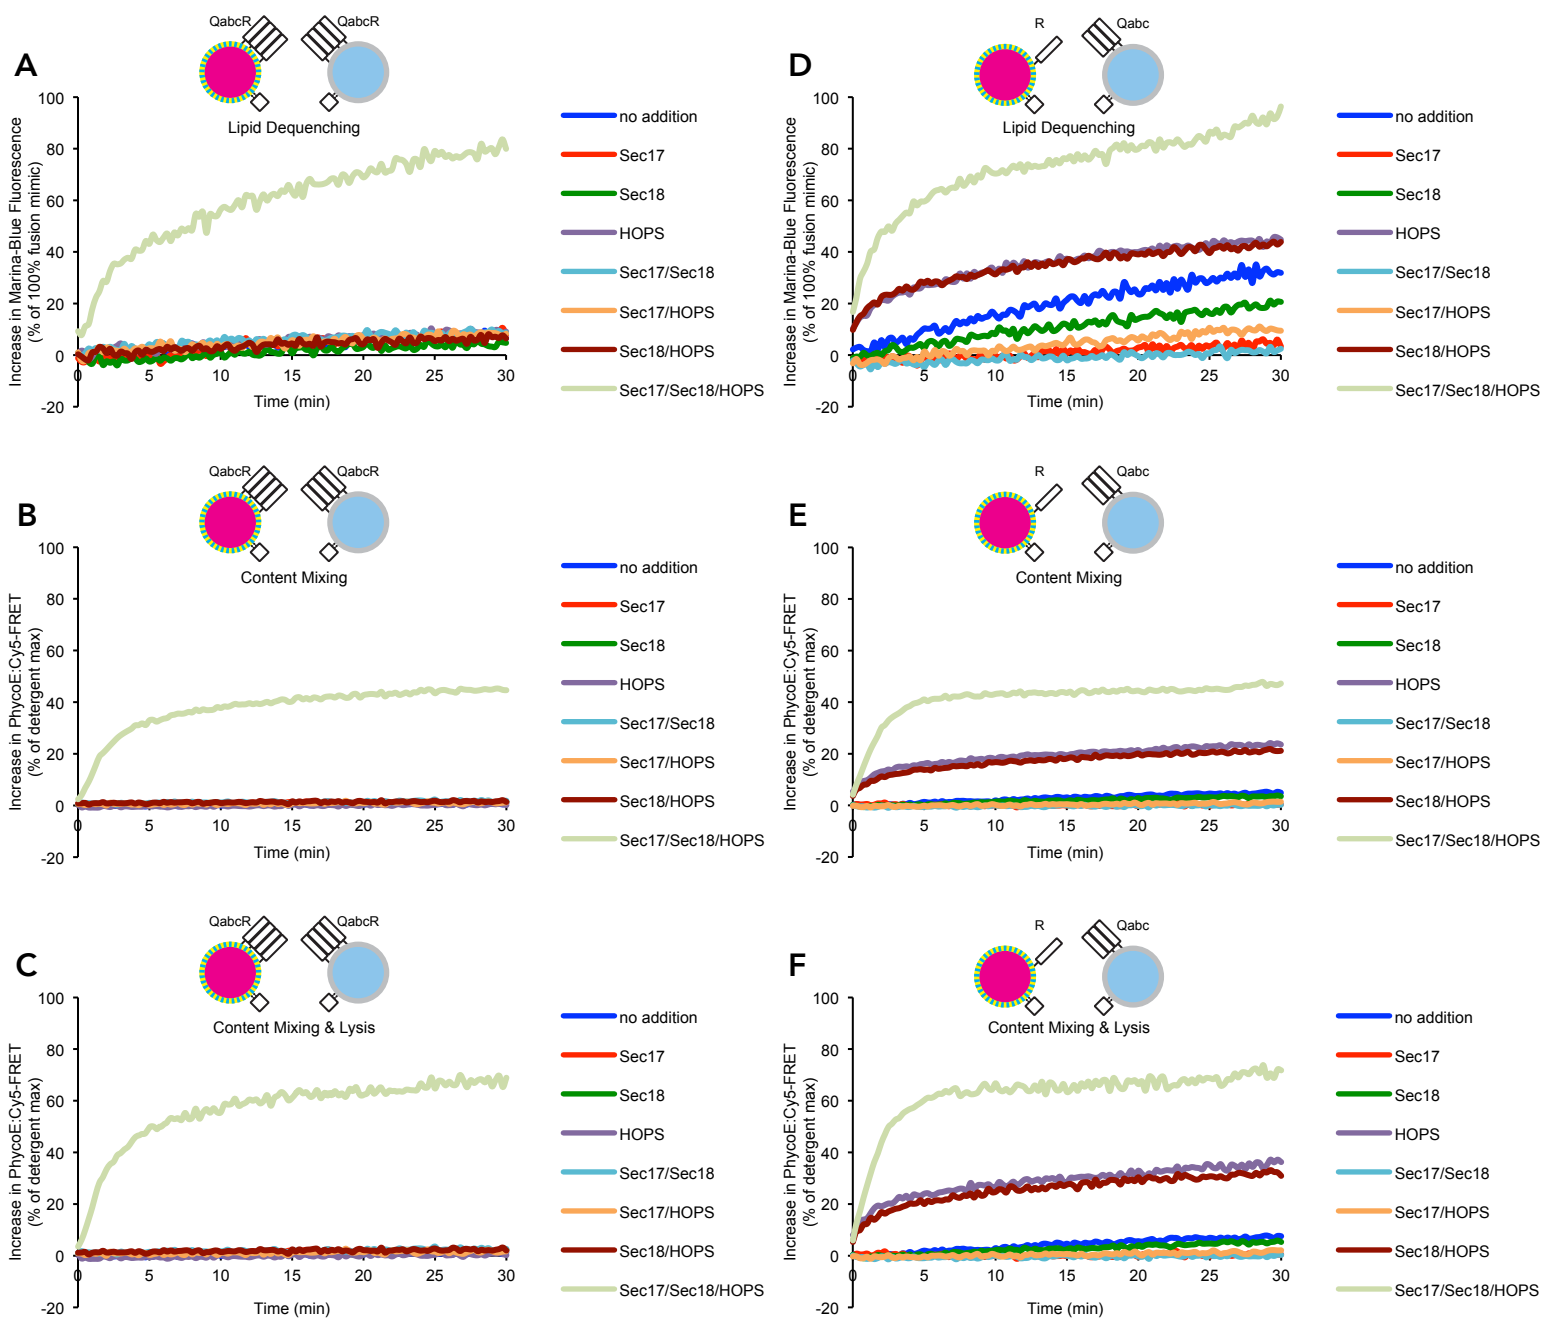

Supplement: supp [file elife-03251-supp-v1.zip]

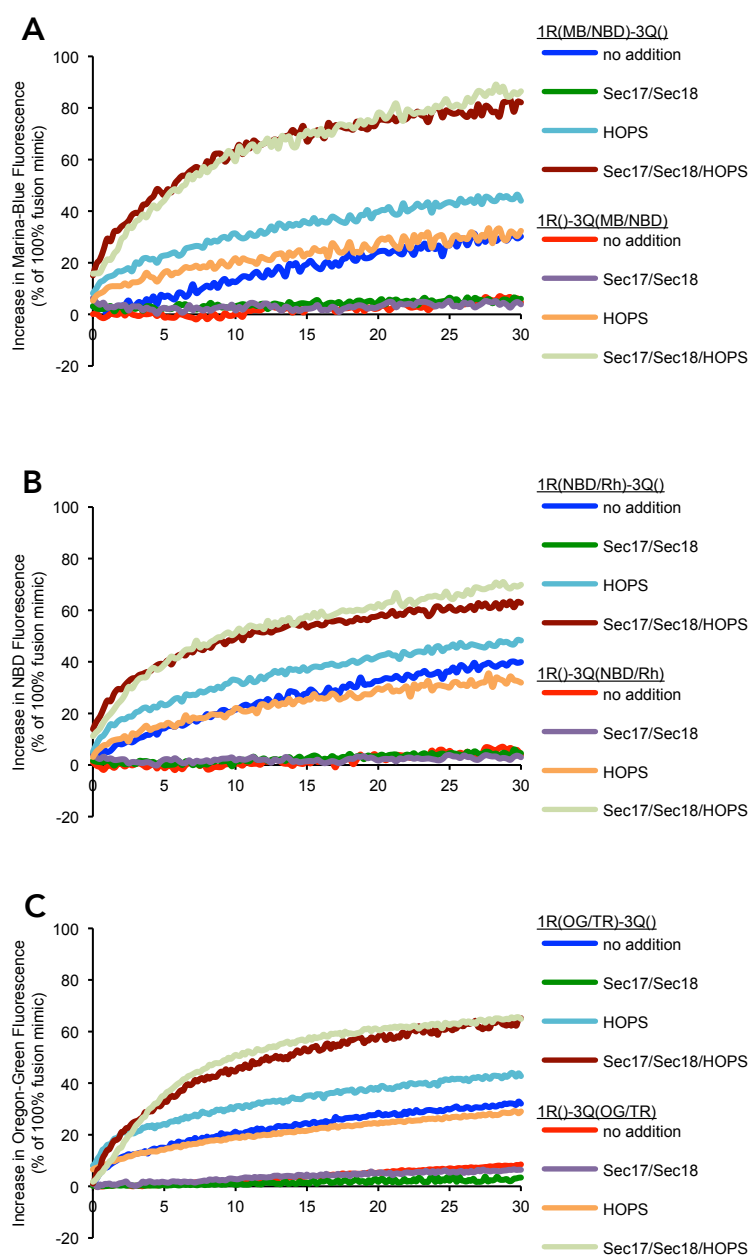

Supplement: supp [file elife-03251-supp-v1.zip]

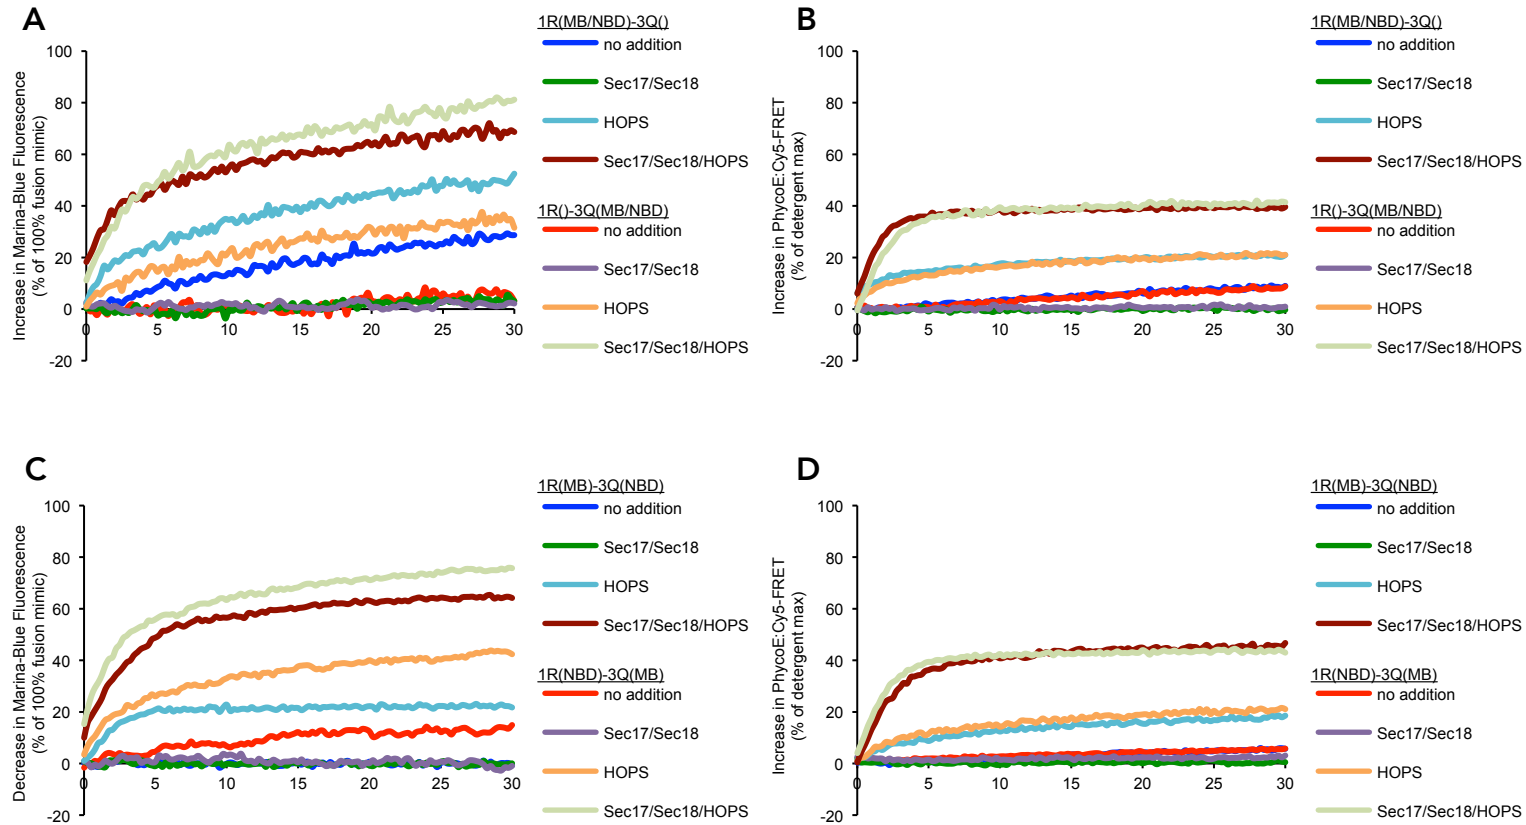

Supplement: supp [file elife-03251-supp-v1.zip]

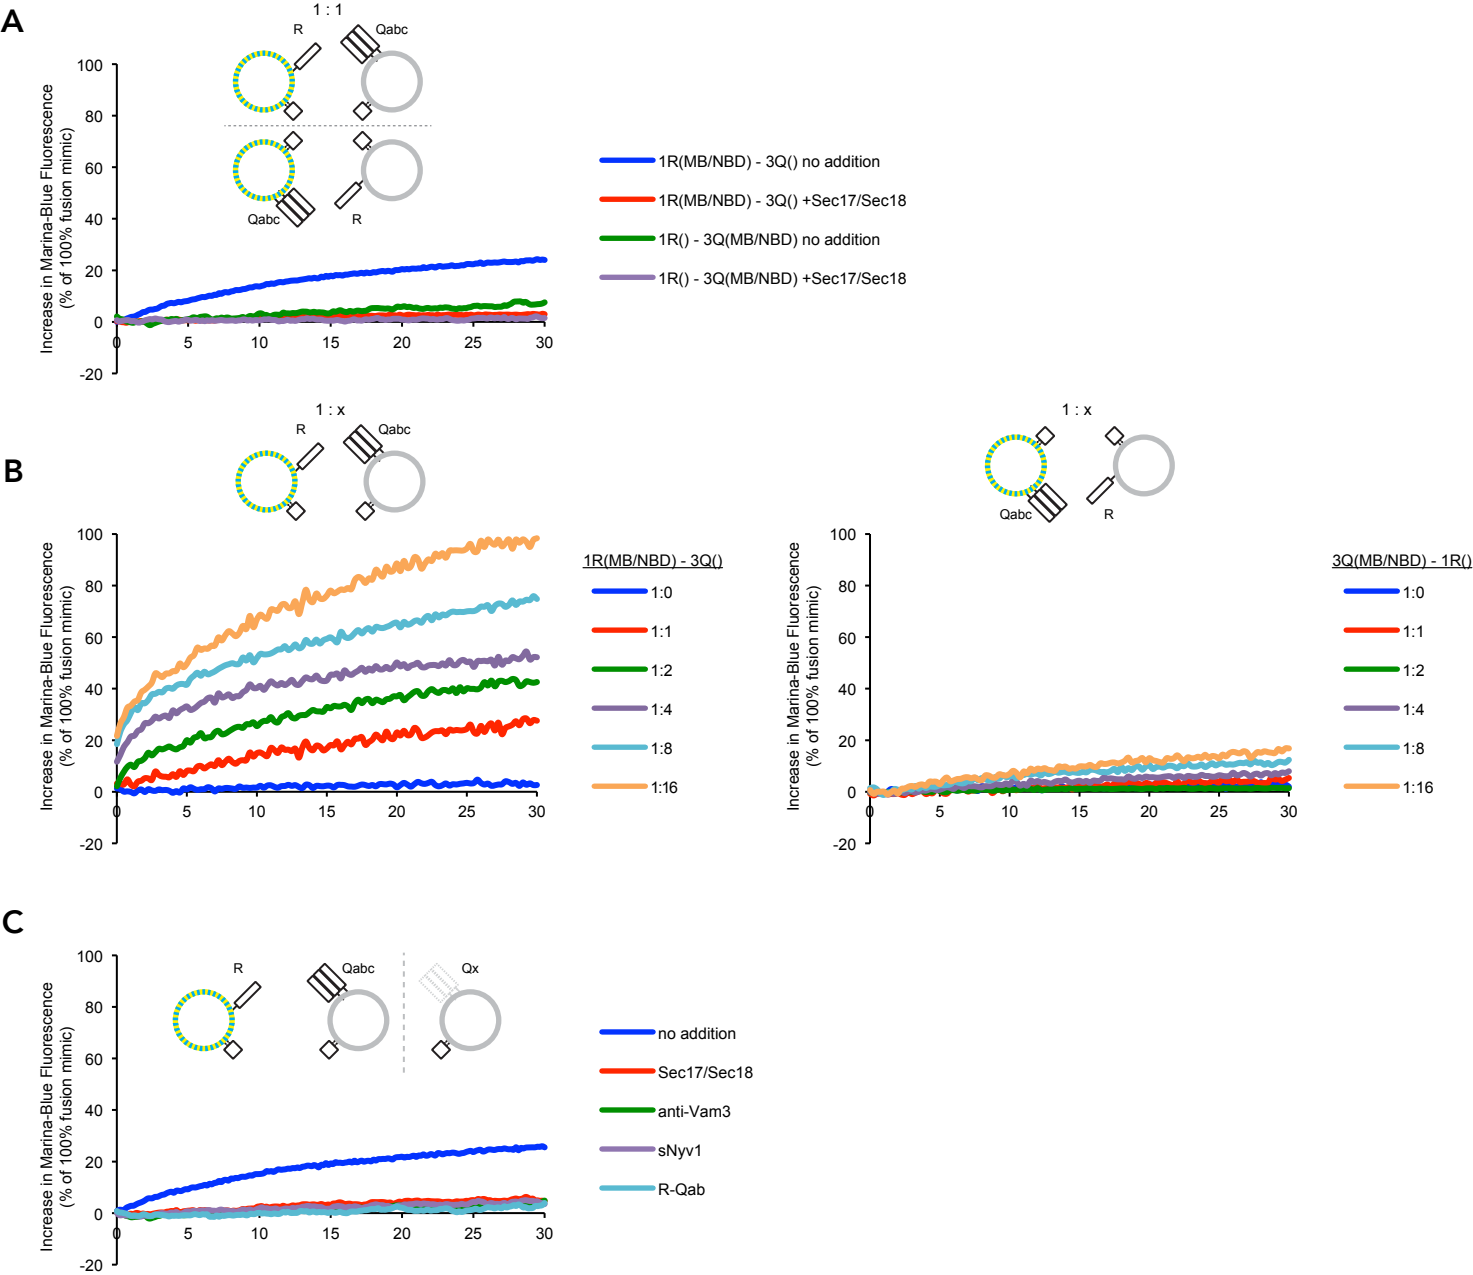

Supplement: supp [file elife-03251-supp-v1.zip]

A

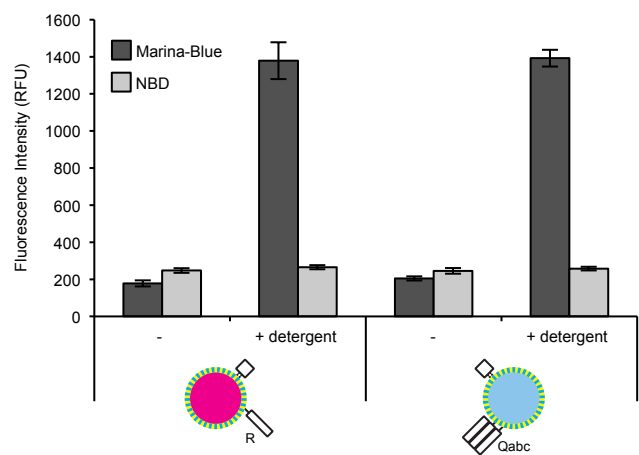

B

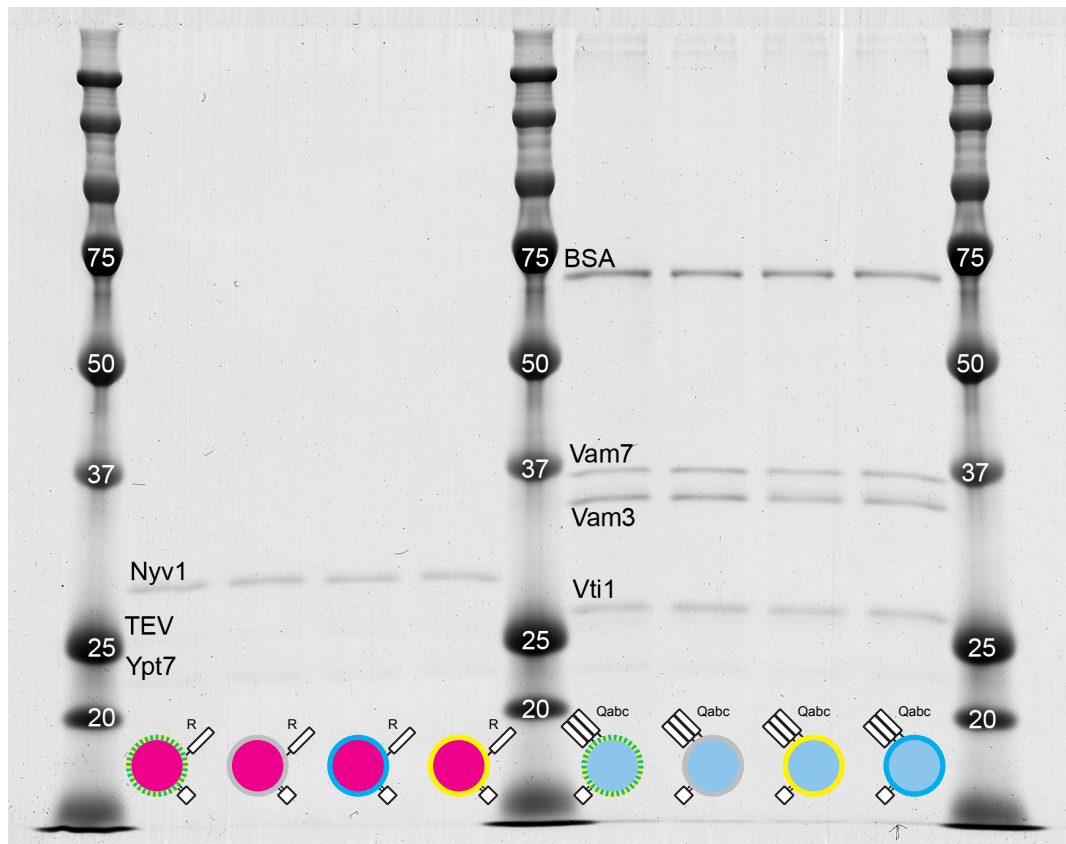

Supplement: supp [file elife-03251-supp-v1.zip]

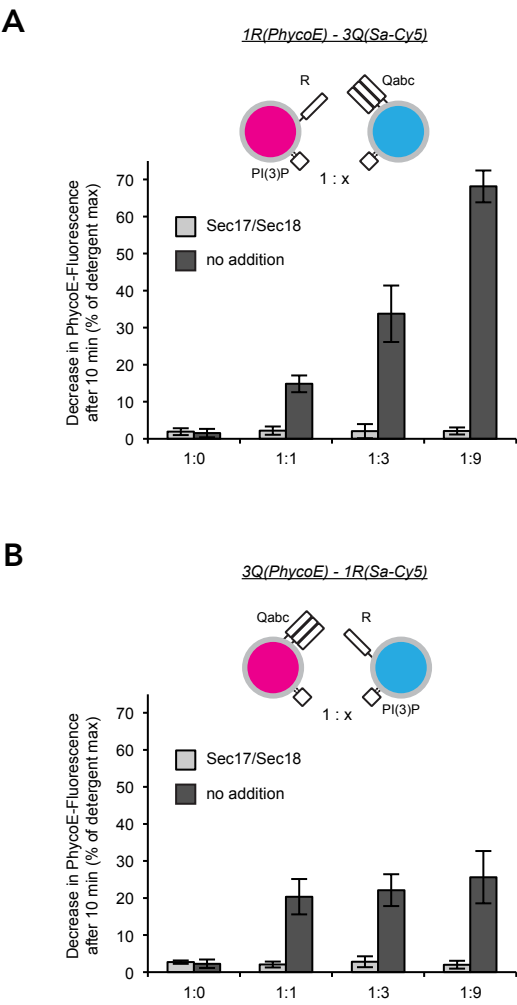

Supplement: supp [file elife-03251-supp-v1.zip]

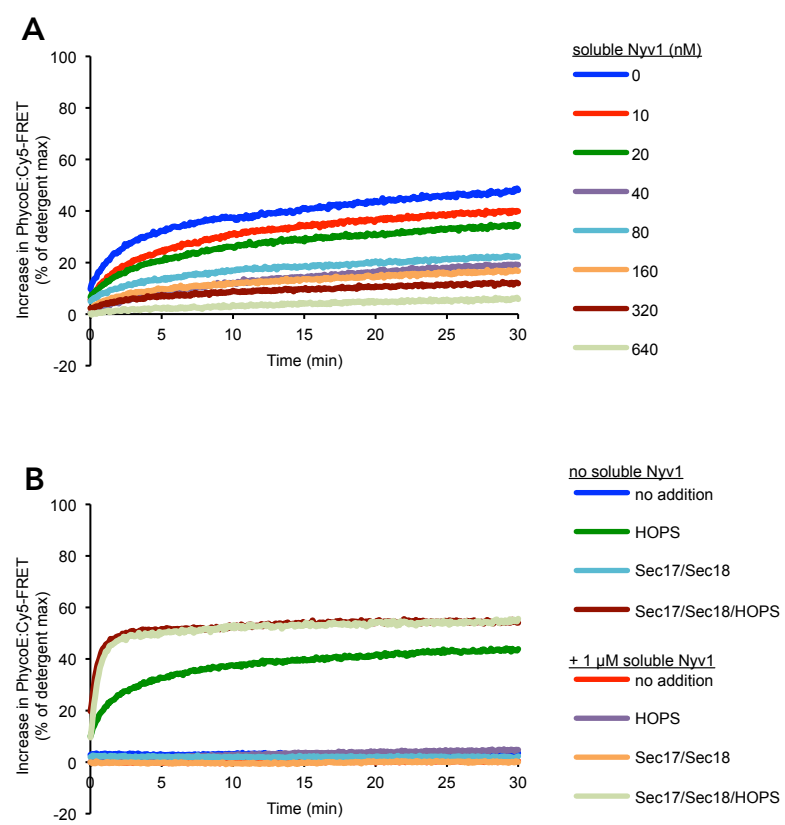

Supplement: supp [file elife-03251-supp-v1.zip]

Zick & Wickner 2014 Figure 3 - Figure supplement 2

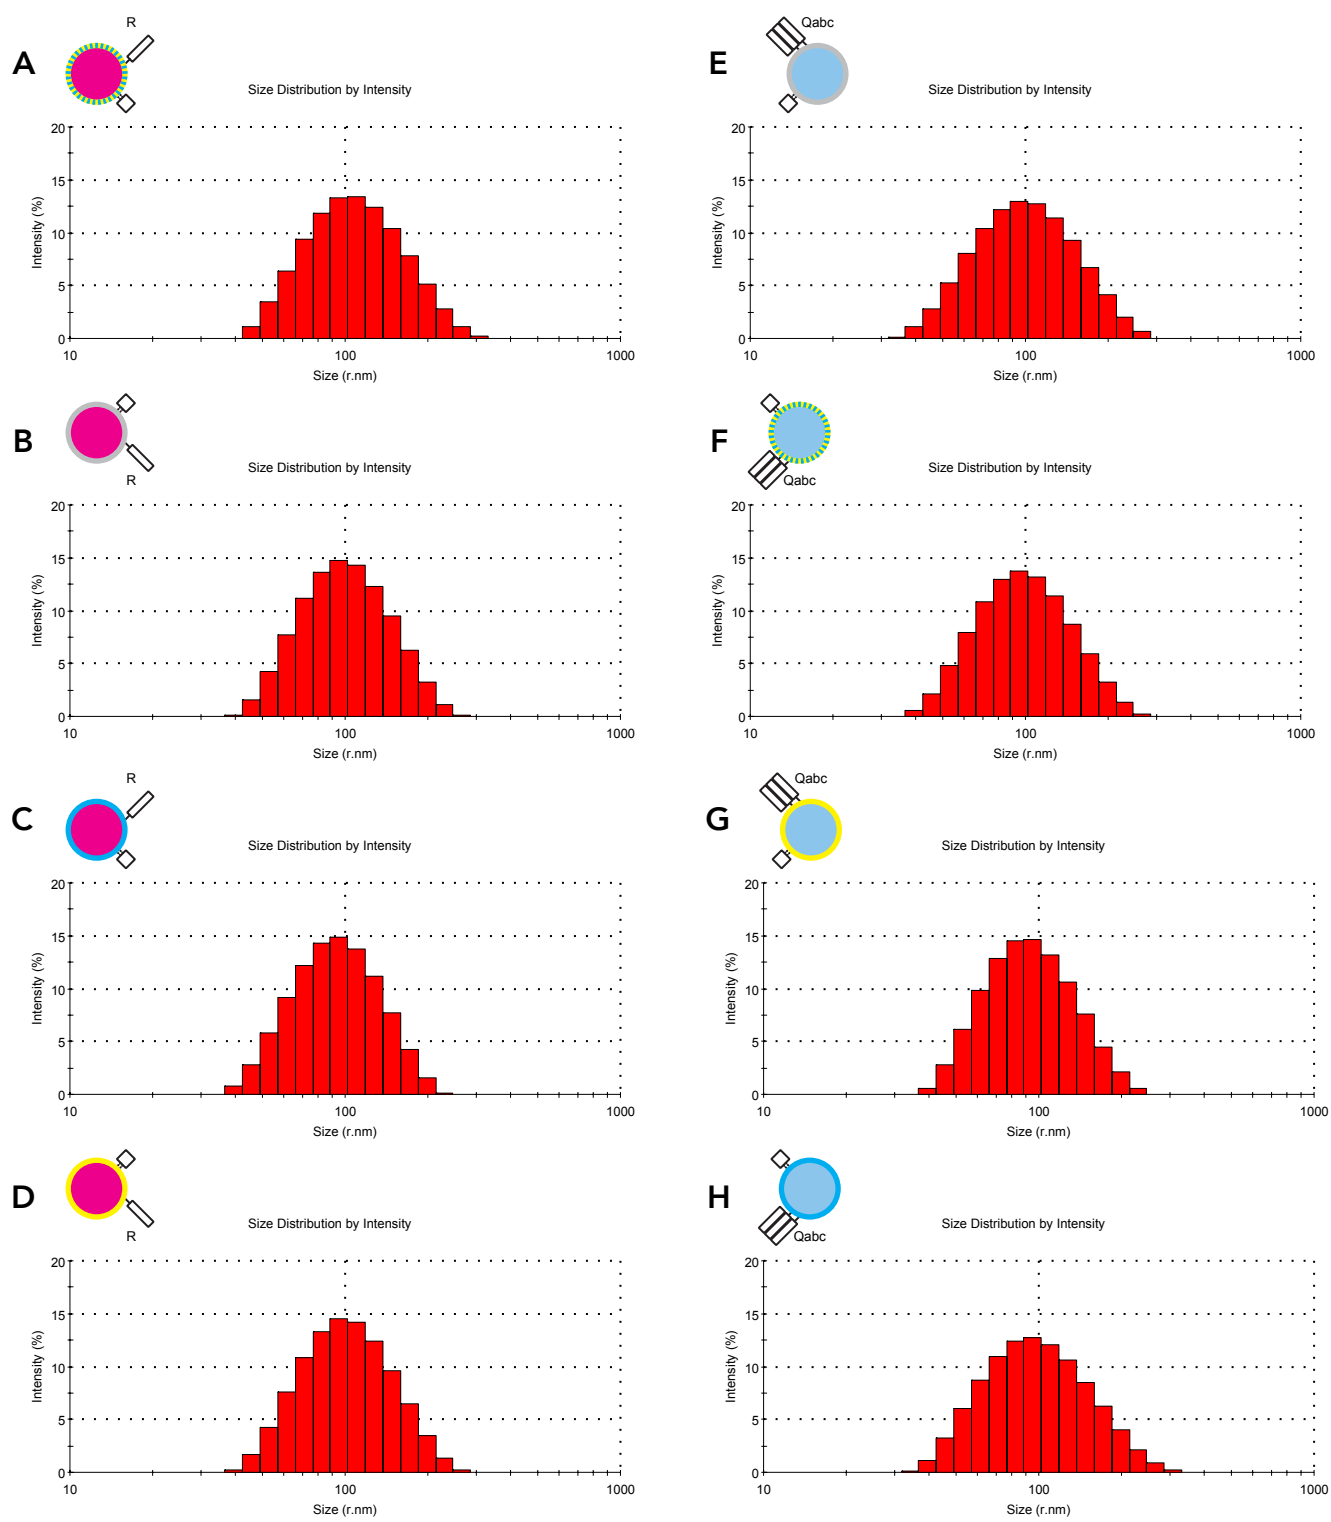

Supplement: supp [file elife-03251-supp-v1.zip]

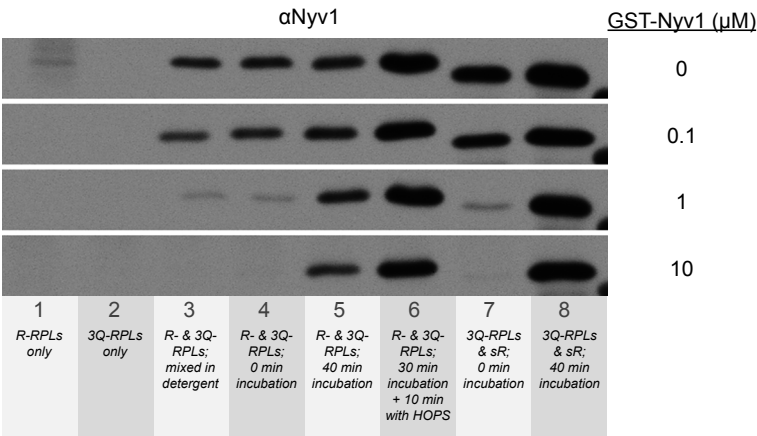

Supplement: supp [file elife-03251-supp-v1.zip]
